# Supplementary material
Source: PubMed Central journal article supplement (PMC9276951)
Supplement: 12264_2022_839_MOESM1_ESM.pdf [file 12264_2022_839_MOESM1_ESM.pdf]

## Supplementary Figures and Figure Legends

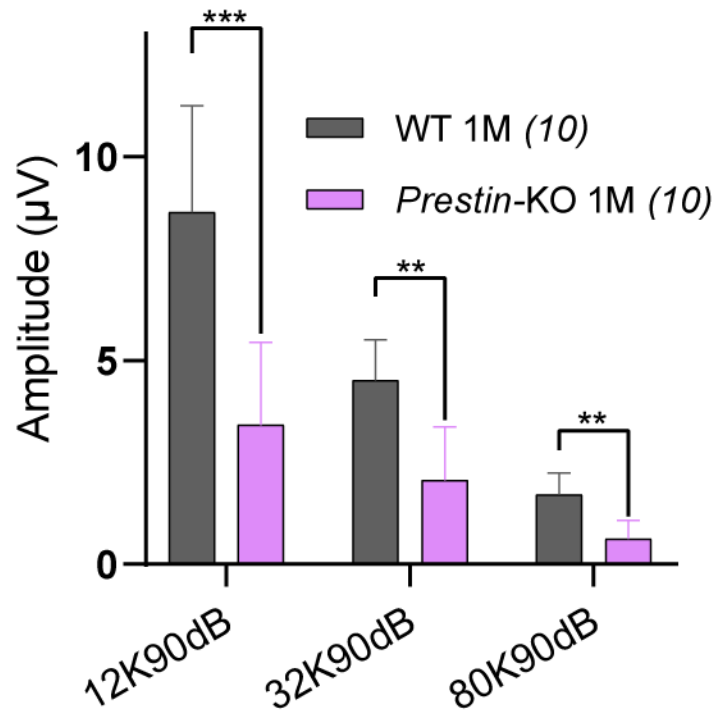

**Fig. S1** Disrupted mABR signals in *Prestin*-knockout mice. The mABR wave I amplitudes in WT mice and *Prestin*-KO mice at 1 month (1M). Mann-Whitney test, 12 kHz, \*\*\* $P = 0.0005$ ; 32 kHz, \*\* $P = 0.0021$ ; 80 kHz, \*\* $P = 0.002$ ; error bars, SD. N numbers are shown in panels.

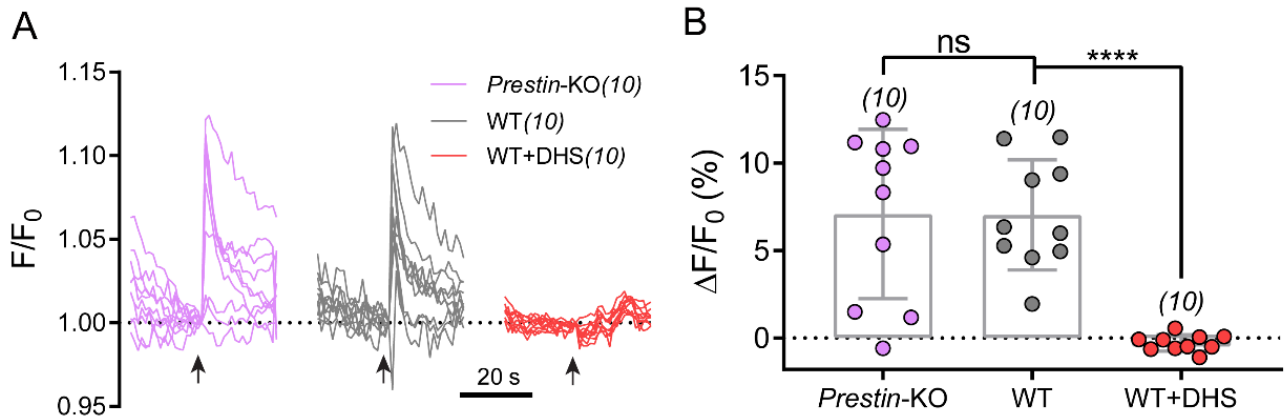

**Fig. S2** Hair-bundle mechanotransduction is preserved in *Prestin*-knockout mice. **A** Fluid-jet stimulation-evoked  $\text{Ca}^{2+}$  responses of OHCs in cochlea preparations from control mice (grey) and *Prestin*-KO mice (purple) and WT hemicochleae treated with 100  $\mu\text{mol/L}$  dihydrostreptomycin (WT+DHS, red). Arrows indicate fluid-jet stimulation. The images were collected at 2-s interval. **B** Quantification of the peak  $\text{Ca}^{2+}$  responses of OHCs calculated from recordings in (A). Brown-Forsythe ANOVA test, *Prestin*-KO vs WT,  $P = 0.9994$ ; WT vs WT+DHS, \*\*\*\* $P < 0.0001$ ; error bars, SD. N numbers are shown in panels.
